# Supplementary material for: PolyQ-Expansion Causes Mitochondria Fragmentation Independent of Huntingtin and Is Distinct from Traumatic Brain Injury (TBI)/Mechanical Stress-Mediated Fragmentation Which Results from Cell Death
Source: MDPI journal article supplement (doi:10.3390/cells12192406), 2023-10-05
Supplement: s1 [file s1]

**A**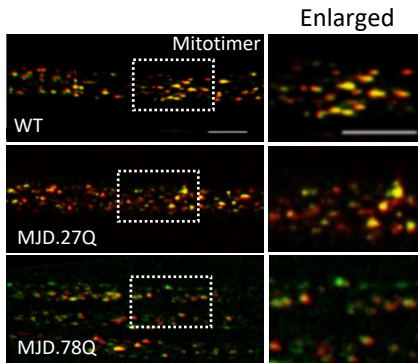**B**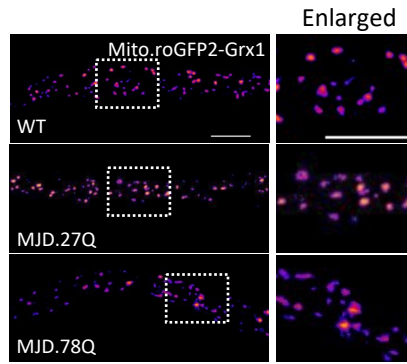**C**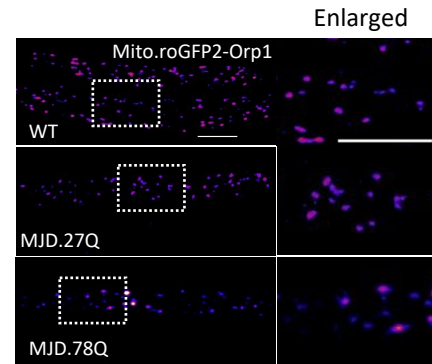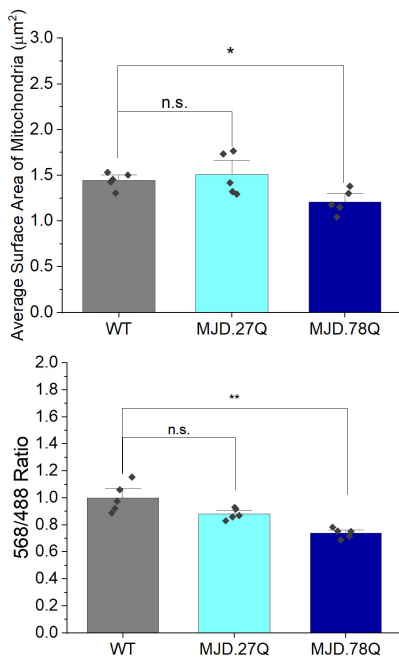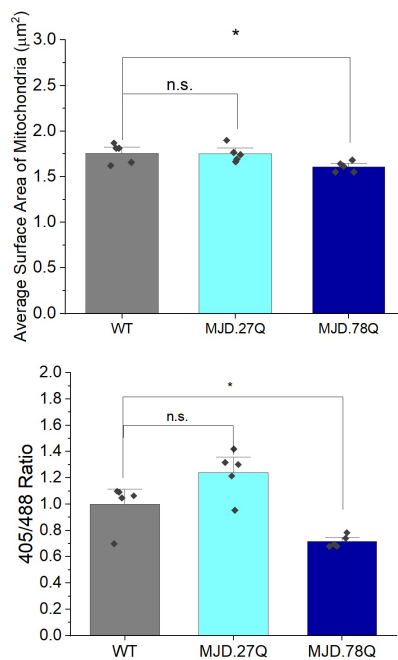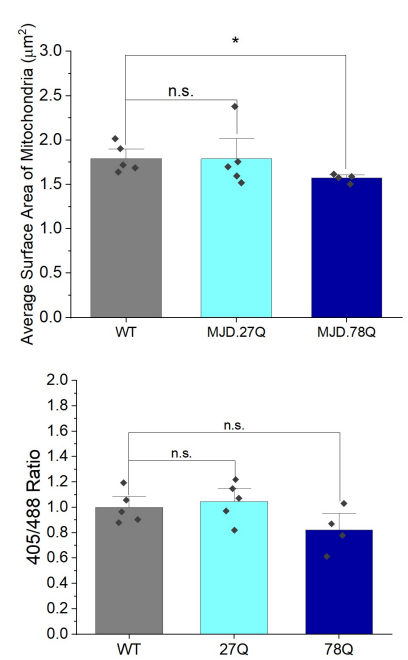

**Figure S1. Pathogenic polyQ repeats in the context of MJD causes mitochondria fragmentation.** Representative images from larvae co-expressing pathogenic polyQ repeats in the context of MJD (MJD.78Q) and mitochondrial health markers MitoTimer which report damaged mitochondria in red and healthy mitochondria in green, MitroGFP2-Grx1 the glutathione redox sensor or MitroGFP2-Orp1 the H<sub>2</sub>O<sub>2</sub> redox sensor. Box shows enlarged area of the larval segmental nerves. Quantification analysis of average mitochondrial surface areas (μm<sup>2</sup>) from larvae expressing MJD.78Q with MitoTimer (p=0.013) (A), or MitroGFP2-Grx1 (p=0.036) (B) or MitroGFP2-Orp1 (p=0.032) (C). Quantification of the 568/488 ratio in MJD.78Q:MitoTimer larvae compared to MitoTimer (WT) larvae (p=0.003) (A), the 405/488 ratio in MJD.78Q:MitroGFP2-Grx1 compared to MitroGFP2-Grx1 (WT) larvae (p=0.017) (B) or the 405/488 ratio in MJD.78Q:MitroGFP2-Orp1 compared to MitroGFP2-Orp1 (WT) larvae (C). n=5 larvae per genotype. Scale bar=5μm for all. Statistical significance was determined using Kruskal-Wallis test followed by Mann-Whitney pairwise comparisons. \*p<0.05, n.s.=p>0.05

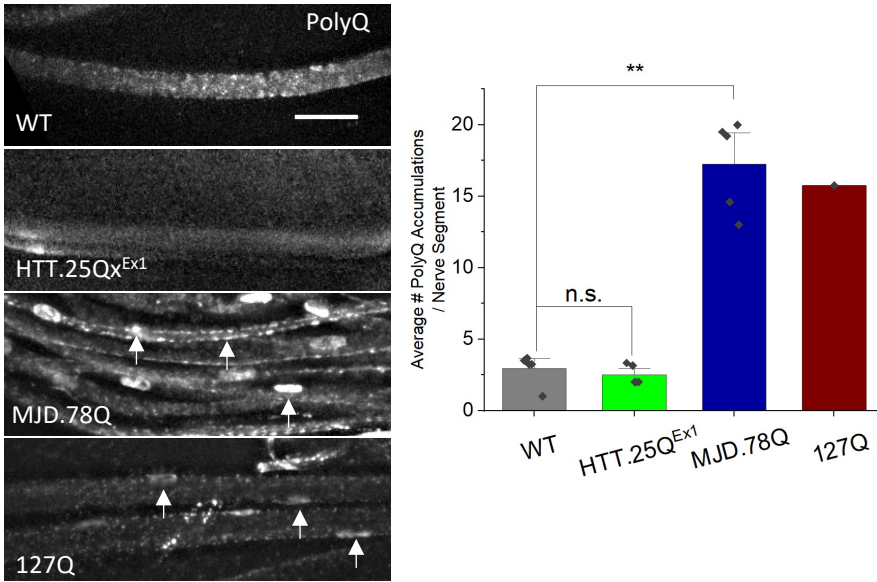

**Figure S2. Pathogenic polyQ repeats cause axonal blockages.** Representative images from larvae expressing MJD.78Q, 127Q and HTT.25Q<sup>ex1</sup> stained with an antibody against polyQ. Quantitative analysis of the average number of polyQ accumulations (arrows) per nerve segment in MJD.78Q larvae ( $p=0.012$ ,  $n=5$  larvae) and 127Q larvae compared to WT ( $n=1$  larvae). Scale bar=10 $\mu$ m. Statistical significance was determined via Kruskal-Wallis test followed by Mann-Whitney pairwise comparisons. \*\*= $p<0.01$ , n.s.= $p>0.05$

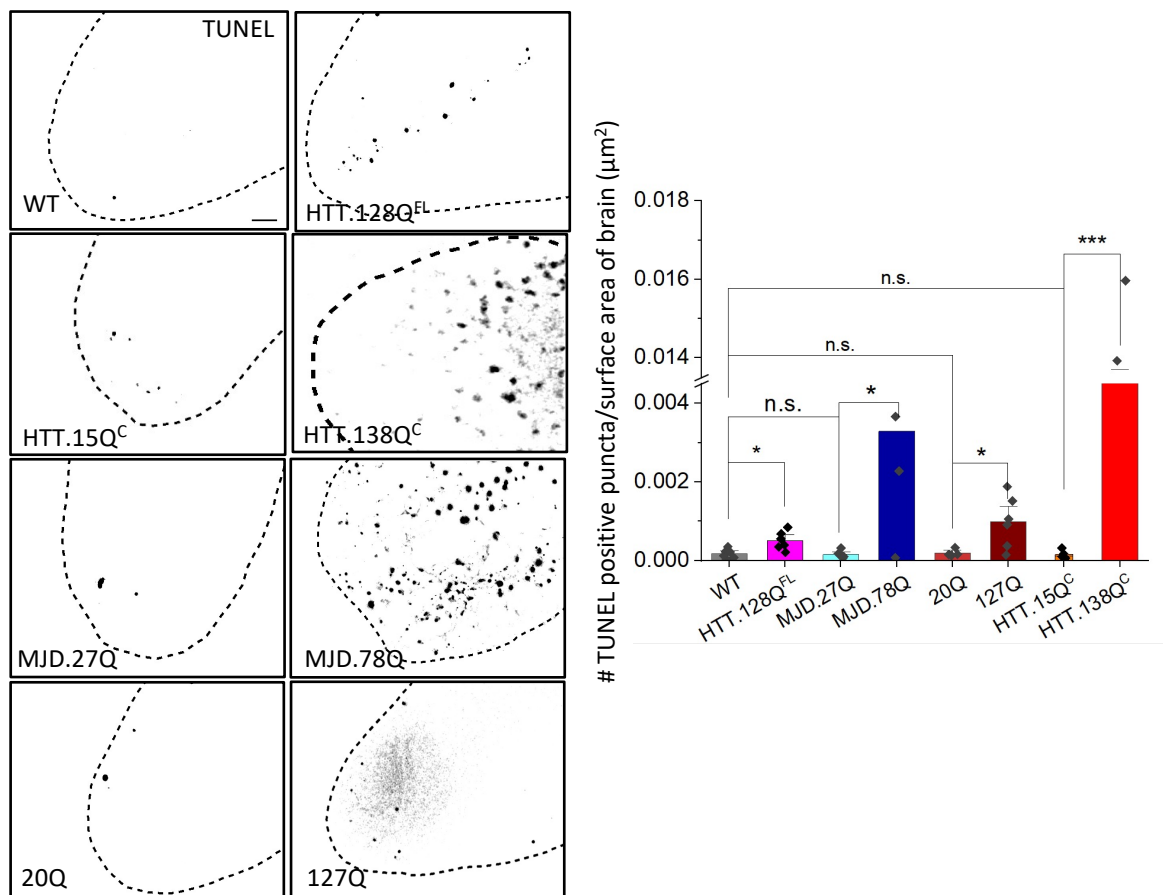

**Figure S3. Pathogenic polyQ repeats cause cell death.** Representative images from HTT.15Q<sup>C</sup>, HTT.128Q<sup>FL</sup>, HTT.138Q<sup>C</sup>, MJD.27Q, MJD.78Q, 20Q and 127Q larval brains subjected to the TUNEL assay. Quantification of the number of TUNEL positive cells per surface area (μm<sup>2</sup>) from HTT.128Q<sup>FL</sup> (p=0.015), MJD.78Q (p=0.032), 127Q (p=0.031) and HTT.138Q<sup>C</sup> (p=0.0003) brains compared to WT, MJD.27Q, 20Q or HTT.15Q<sup>C</sup>. n=5 larvae per genotype. Scale bar=5μm. Statistical significance was determined using Kruskal-Wallis test followed by Mann-Whitney pairwise comparisons. \*\*\*=p<0.001, \*\*=p<0.01, \*=p<0.05, n.s.=p>0.05

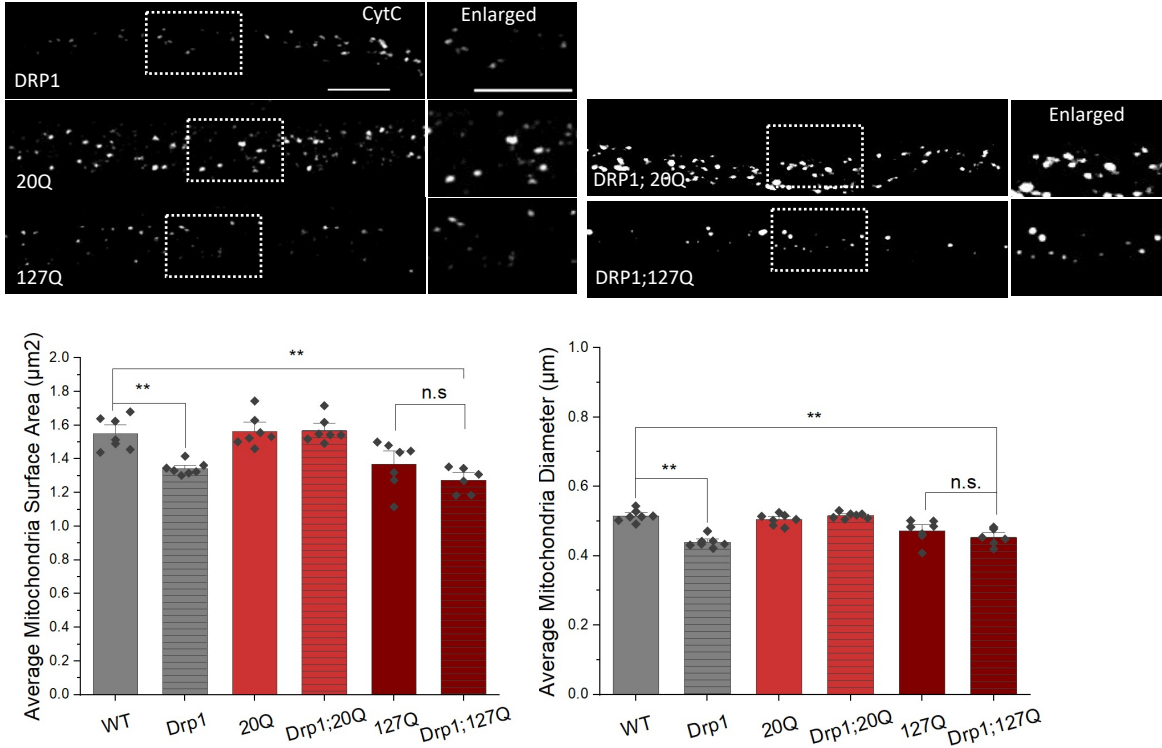

**Figure S4. Excess fission protein DRP1 has no effect on polyQ-mediated mitochondrial fragmentation.** Representative images from DRP1 expressing larvae or larvae co-expressing DRP1 with 20Q (DRP1;20Q) or with 127Q (DRP1;127Q) stained with CytC. Box shows enlarged area. Quantitative analysis of the average mitochondrial surface area ( $\mu\text{m}^2$ ) in DRP1;127Q larvae compared to WT larvae ( $p=0.002$ ). Quantification of the average mitochondrial diameter ( $\mu\text{m}$ ) in DRP1;127Q larvae compared to WT larvae ( $p=0.002$ ). Quantification analysis of the average mitochondrial surface area ( $p=0.003$ ) and diameter ( $p=0.002$ ) in DRP1 larvae compared to WT.  $n=6$  larvae per genotype. Scale bar= $5\mu\text{m}$ . Statistical significance was determined using Kruskal-Wallis test followed by Mann-Whitney pairwise comparisons.  $*$ = $p<0.05$ ,  $**$ = $p<0.01$ ,  $***$ = $p<0.001$ . n.s.= $p>0.05$

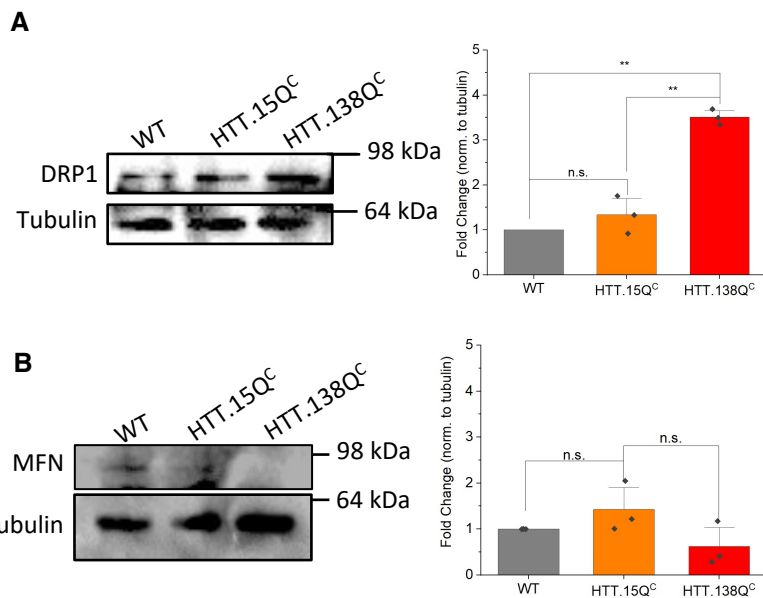

**Figure S5. Western blot analysis of DRP1 and MFN levels in pathogenic polyQ larval brains.** (A) A representative western blot of proteins isolated from WT, HTT.15Q<sup>C</sup> and HTT.138Q<sup>C</sup> larval brains stained with DRP1 and Tubulin (loading control) antibodies. Quantification of the fold change of DRP1 normalized to tubulin in HTT.138Q<sup>C</sup> brains compared to WT ( $p=0.0015$ ) or compared to HTT.15Q<sup>C</sup> ( $p=0.0057$ ). (B) A representative western blot of proteins isolated from WT, HTT.15Q<sup>C</sup> and HTT.138Q<sup>C</sup> larval brains stained with MFN and Tubulin (loading control) antibodies. Quantification of the fold change of MFN normalized to tubulin in HTT.138Q<sup>C</sup> brains compared to WT or to HTT.15Q<sup>C</sup>.  $n=3$  experiments. Statistical significance was determined via one-way ANOVA followed by Student's t-test.  $**=p<0.01$ ,  $n.s.=p>0.05$

**Table S1- Comparative summary of HD/polyQ and TBI/mechanical stress conditions**

|                          |                                       | Wild Type | HD/polyQ expression             | TBI/mechanical stress |
|--------------------------|---------------------------------------|-----------|---------------------------------|-----------------------|
| Fragmented mitochondria  | CytC                                  | NO        | YES                             | YES                   |
|                          | MitoTimer                             | NO        | YES                             | -                     |
|                          | MitroGFP2-GRX1                        | NO        | YES                             | -                     |
|                          | MitroGFP2-Orp1                        | NO        | YES                             | -                     |
| $\Delta\Psi_m$           | JC-1                                  | NO        | NO                              | Hyperpolarized        |
|                          | TMRM                                  | NO        | NO                              | Hyperpolarized        |
| Axonal transport defects | CSP                                   | NO        | YES                             | YES                   |
| Cell death               | TUNEL                                 | NO        | YES                             | YES                   |
| Nitric Oxide             | DAF                                   | NO        | Increased                       | n/a                   |
|                          | L-NAME                                | NO        | Rescued fragmented mitochondria | n/a                   |
| Fission-Fusion protein   | DRP1 Reduction (DRP mutant and mDivi) | -         | Rescued fragmented mitochondria | n/a                   |
|                          | DRP1 Overexpression                   | -         | No effect                       | n/a                   |
|                          | MFN Overexpression                    | -         | Rescued fragmented mitochondria | n/a                   |
